# Supplementary material
Source: ML conference proceedings conference paper supplement (https://openreview.net/forum?id=zRxRbBsqwE)

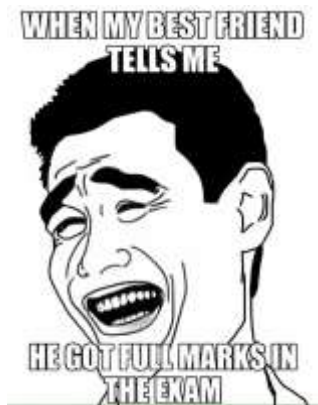

when my best friend tells me he got full marks in the exam

True Label      Sarcastic

GPT-4o      Non-Sarcastic ❌

Claude-4      Non-Sarcastic ❌

Commander  
GPT:

- 🔥 Context Modeling
- 🔥 Sentiment Analysis
- 🔥 Facial Expression
- 🔥 Scene Text Recognition
- 🔥 Image Summarization

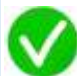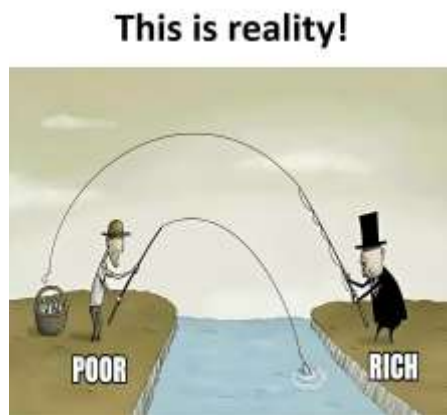

this is reality ... lol

Sarcastic

Non-Sarcastic ❌

Non-Sarcastic ❌

- 🔥 Context Modeling
- 🔥 Sentiment Analysis
- 🔥 Image Summarization
- 🔥 Scene Text Recognition

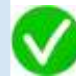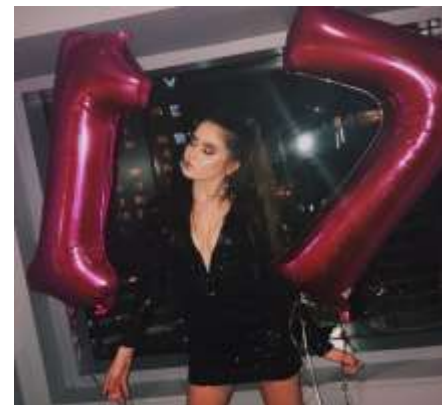

lowkey miss this outfit and this night

Non-Sarcastic

Sarcastic ❌

Sarcastic ❌

- 🔥 Context Modeling
- 🔥 Sentiment Analysis
- 🔥 Facial Expression
- 🔥 Image Summarization

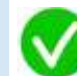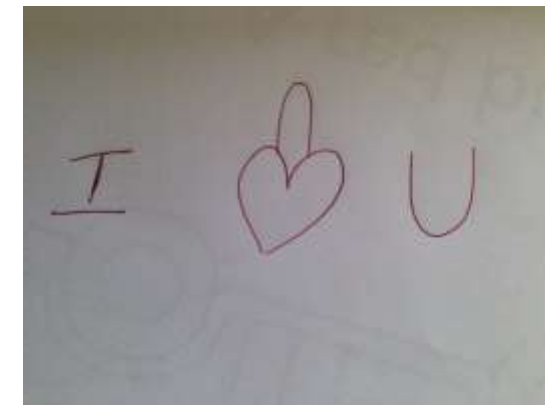

when you say i love you to a person you hate ! ...

Sarcastic

Sarcastic ✅

Sarcastic ✅

- 🔥 Context Modeling
- 🔥 Sentiment Analysis
- 🔥 Image Summarization

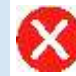

Supplement: supplementary_material [file 888.pdf › image/888.pdf]
