# Supplementary material
Source: ML conference proceedings conference paper supplement (https://openreview.net/forum?id=zRxRbBsqwE)

**Instruction:** Based on the content in the Text and Image and additional information, determine if there is any satirical meaning.

**Text:** every good brand strategy includes modal usage guidelines .

**Attachment**

**Sentiment:** "neutral", "approval"  
**Keyword:** "brand, guidelines, modal"  
**Rhetoric:** "",  
**Fce-exp:** "",  
**Img-sum:** a close up of a speech bubble with a quote on it,  
**Tex-ext:** Brands, content managers, and developers nee

Image

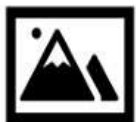

Brands, content managers, and developers need to put more thought into when to use modals

Input

GPT-4o mini

O3 mini

Commander-GPT

Output

The text and image don't seem to convey a satirical meaning. The phrase "Brands, content managers, and developers need to put more thought into...", likely referring to pop-up modal windows in user experience design.....

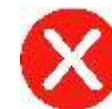

The text in the image does not seem to contain any satirical meaning. It appears to be a straightforward statement suggesting that brands, content managers, and developers should carefully consider when to use modals in their strategies. ...

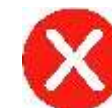

The sentiment expressed in the text is sarcasm. The keywords "brand", "guidelines", .... The image description..., implying a pretentious or exaggerated statement. Overall, the response to this task would involve recognizing the irony in suggesting that....

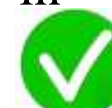

Supplement: supplementary_material [file background.pdf › image/background.pdf]
