# Supplementary material
Source: ML conference proceedings conference paper supplement (https://openreview.net/forum?id=zRxRbBsqwE)
Supplement: supplementary_material [file Flowchart.pdf › image/Flowchart.pdf]

The input consists of a segment of **text** and a photo **featuring subtitles and a person**.

Perform data analysis and provide the final judgment.

Text  
i feel picture  
represents  
<usethis> very  
well right now  
lol ...  
Image

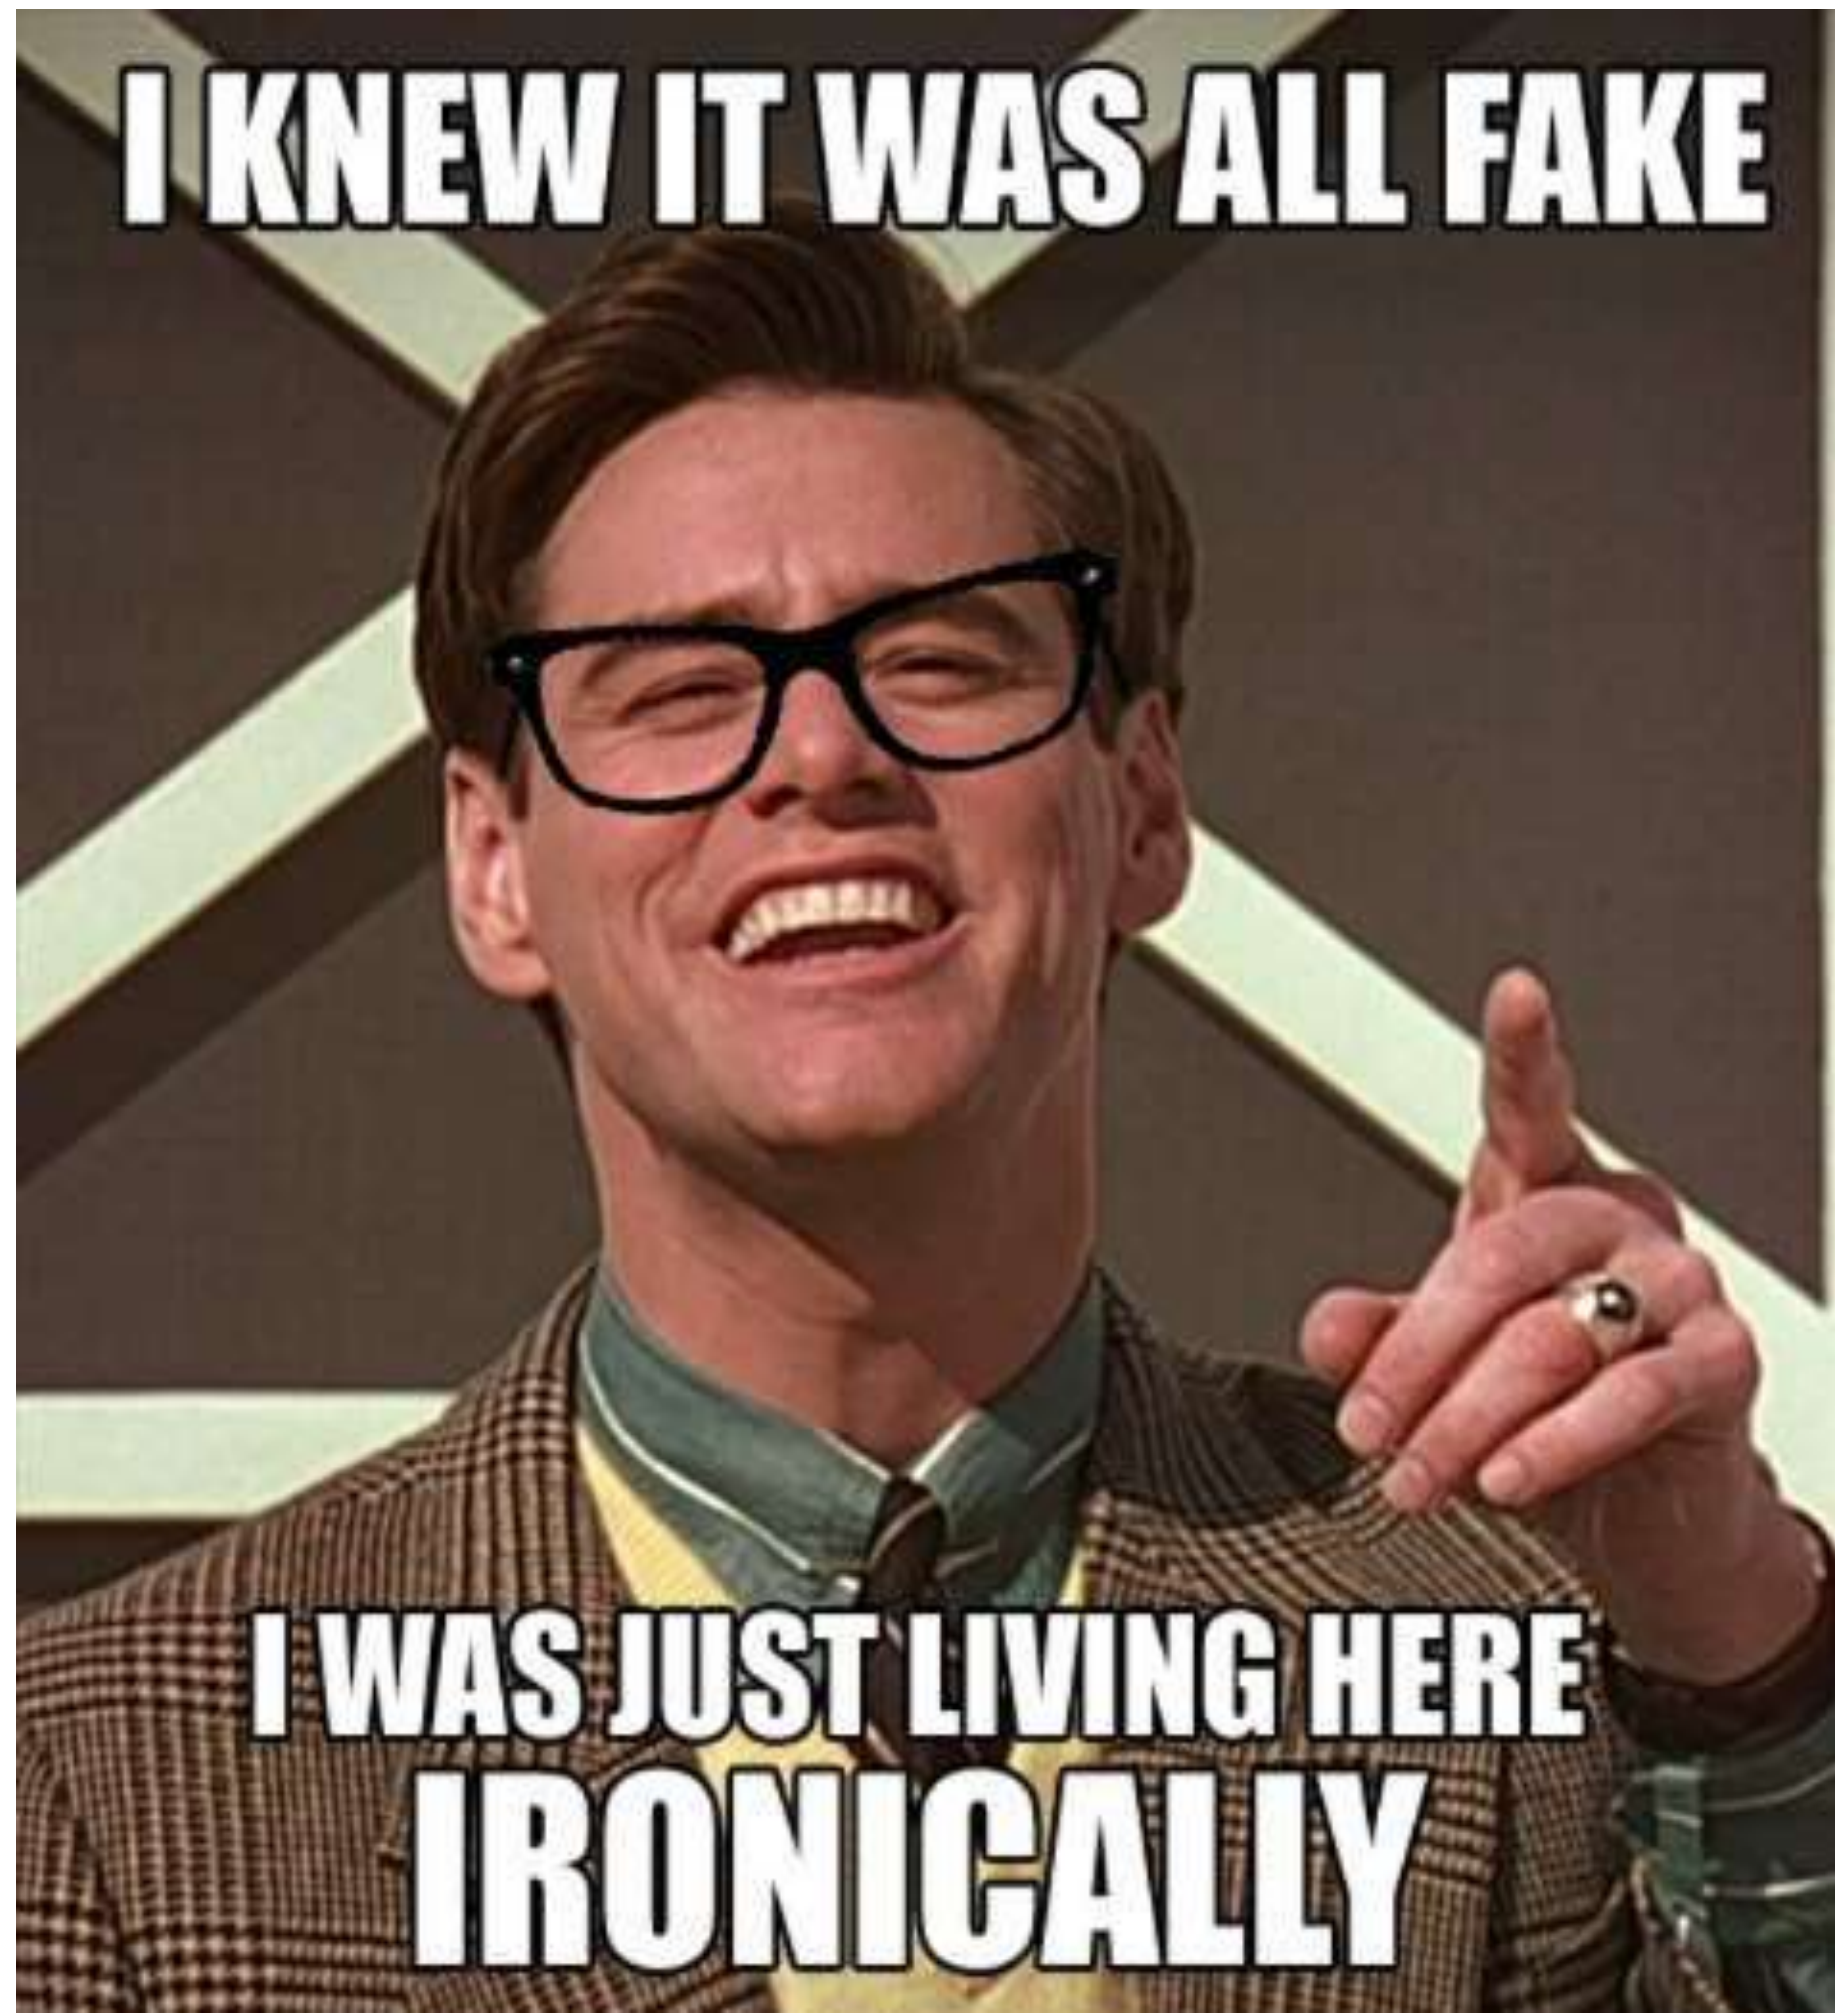

Task  
Analysis

Task  
Distribution

Commande  
r-GPT

General  
Civil

Keyword

Sentiment

Rhetoric

General  
Military

Fac-exp

Img-sum

Tex-ext

**Keyword:** Extract keywords from the text. **Sentiment:** Analyze the sentiment expressed in the sentence. **Rhetoric:** Identify the rhetorical devices used in the text. **Fac-exp:** Recognize the facial expressions of the person in the image. **Img-sum:** Describe the content of the image. **Tex-ext:** Identify the subtitles in the image.

**Label**  
Sarcastic

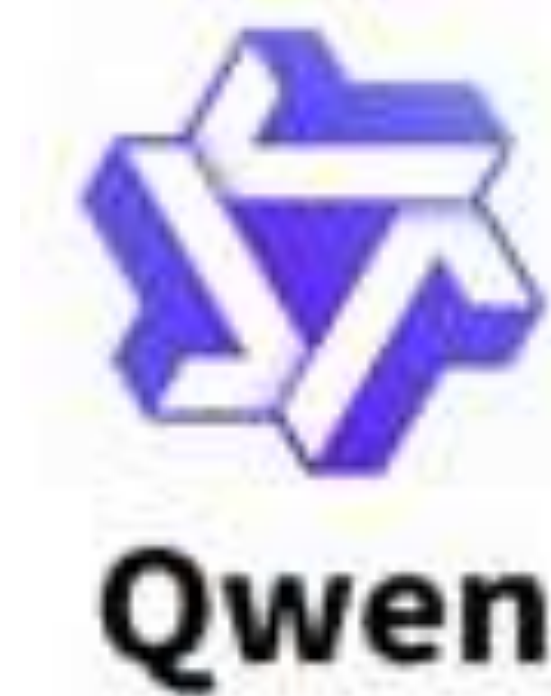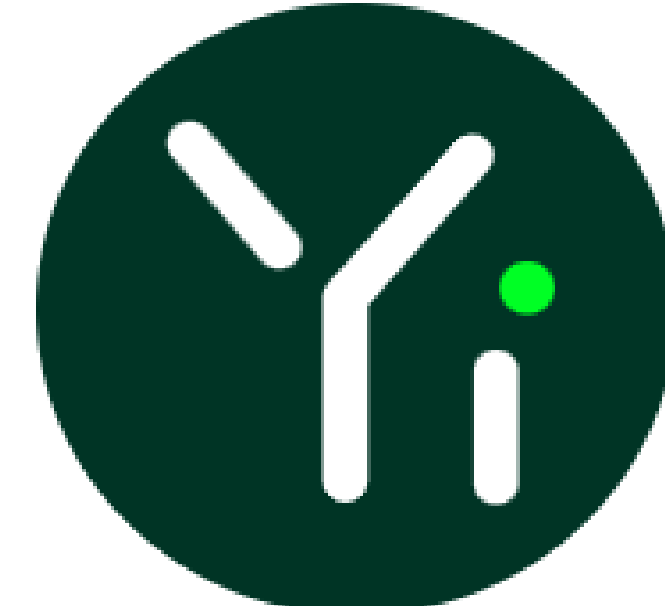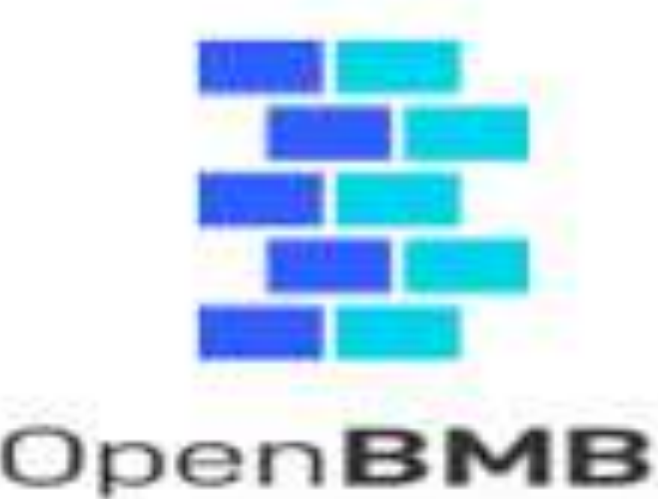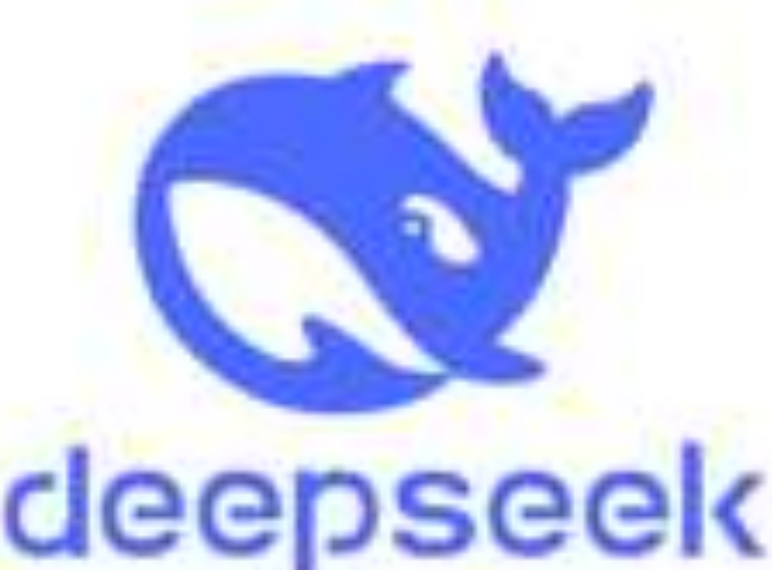

**Keyword:** <user>,represents,picture  
**Sentiment:**amusement, joy, admiration  
**Rhetoric:**NULL  
**Fac-exp:** happy  
**Img-sum:** arafed man in suit and tie with glasses giving the thumbs up  
**Tex-ext:** I KNEW IT WAS ALL FAKE I WAS JUST LIVING HERE IRONICALLY

Make a comprehensive judgment on sarcasm based on the information provided by each submodule.
