# Supplementary material
Source: ML conference proceedings conference paper supplement (https://openreview.net/forum?id=zRxRbBsqwE)

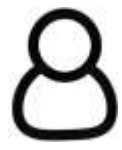

You are labeling whether a specific analysis step is necessary to decide sarcasm.

Context Modeling :The burgers and fries **match the caption literally**, showing a food ad about healthy protein.

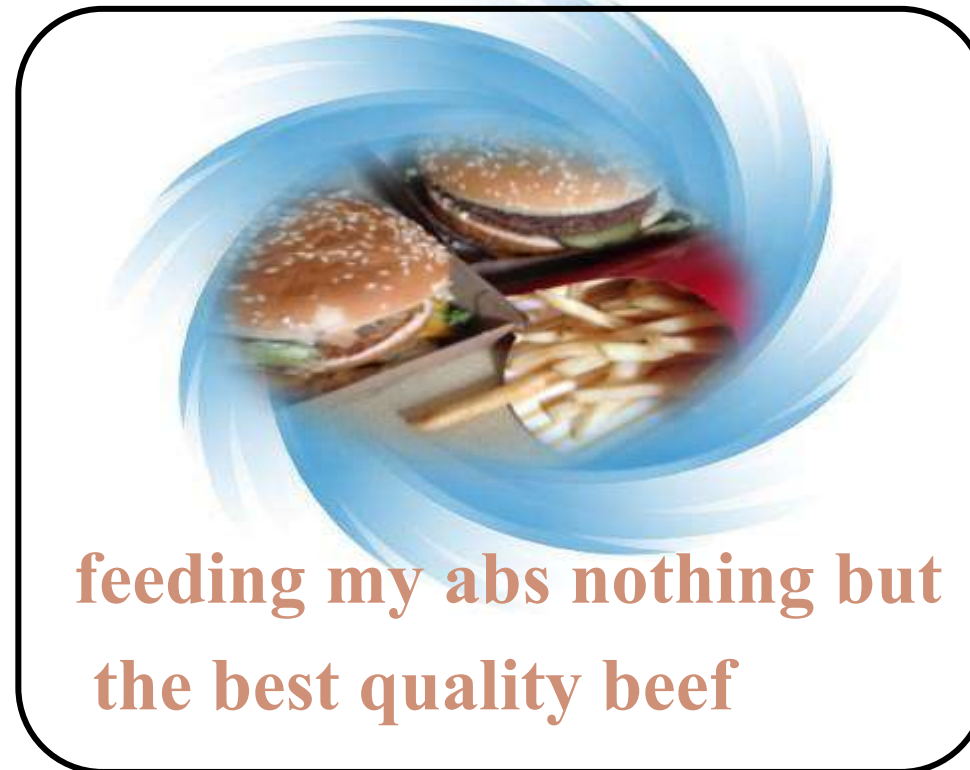

Sentiment Analysis:The phrase uses "best quality" with a **positive, admiring tone**, no negativity detected.

Rhetorical Device: This is **simple hyperbole for advertising**, not irony.

Image Summarization: The picture shows hamburgers and fries, **aligned with the praise of beef quality**.

**Final Judgment:**All dimensions suggest it is **non-sarcastic praise**, not sarcasm.

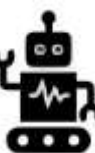

Supplement: supplementary_material [file Hallucination.pdf › image/Hallucination.pdf]
