# Supplementary material
Source: ML conference proceedings conference paper supplement (https://openreview.net/forum?id=zRxRbBsqwE)

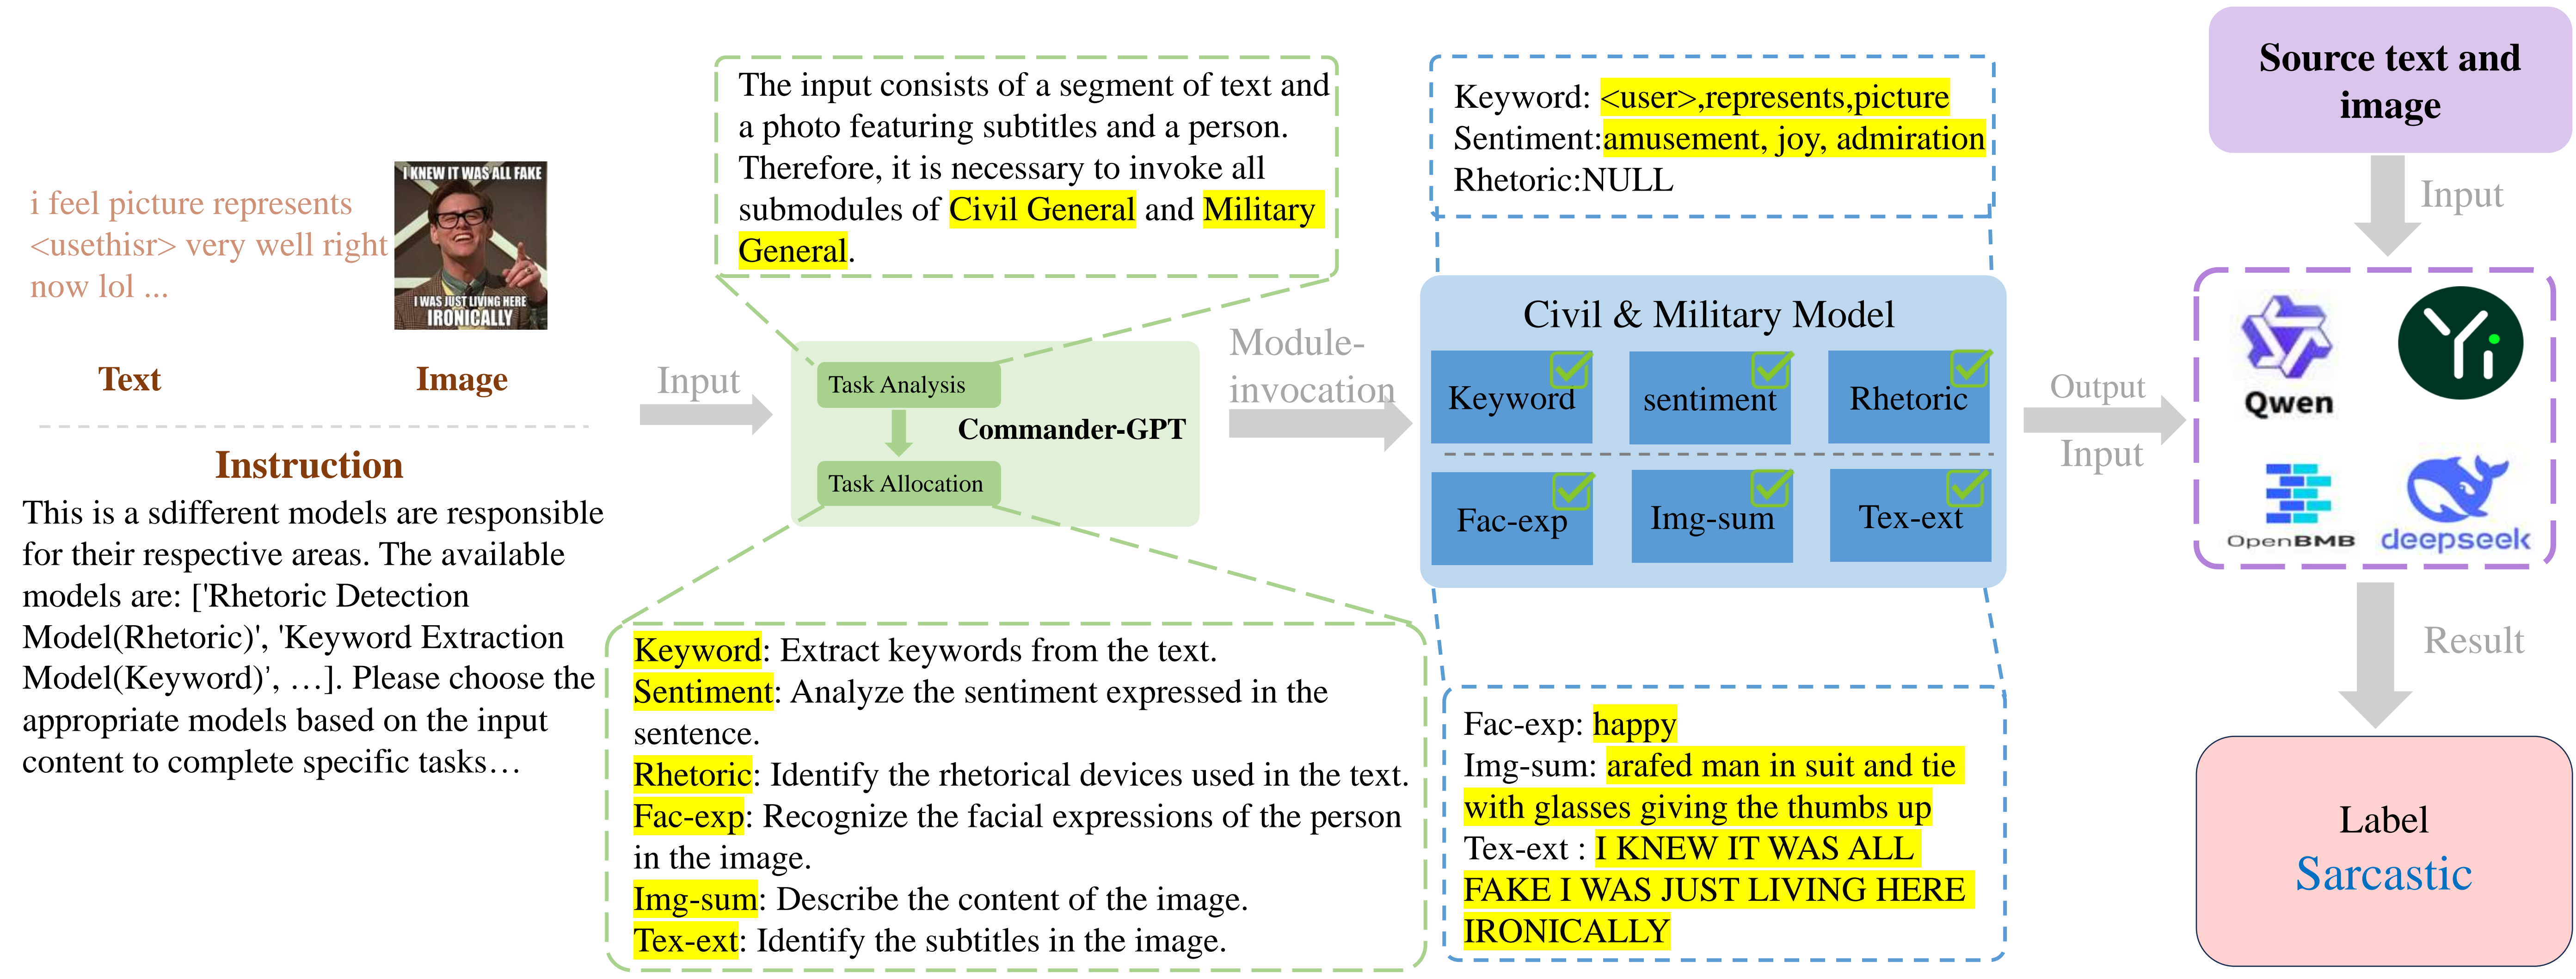

Supplement: supplementary_material [file yuanlitu.pdf › image/yuanlitu.pdf]

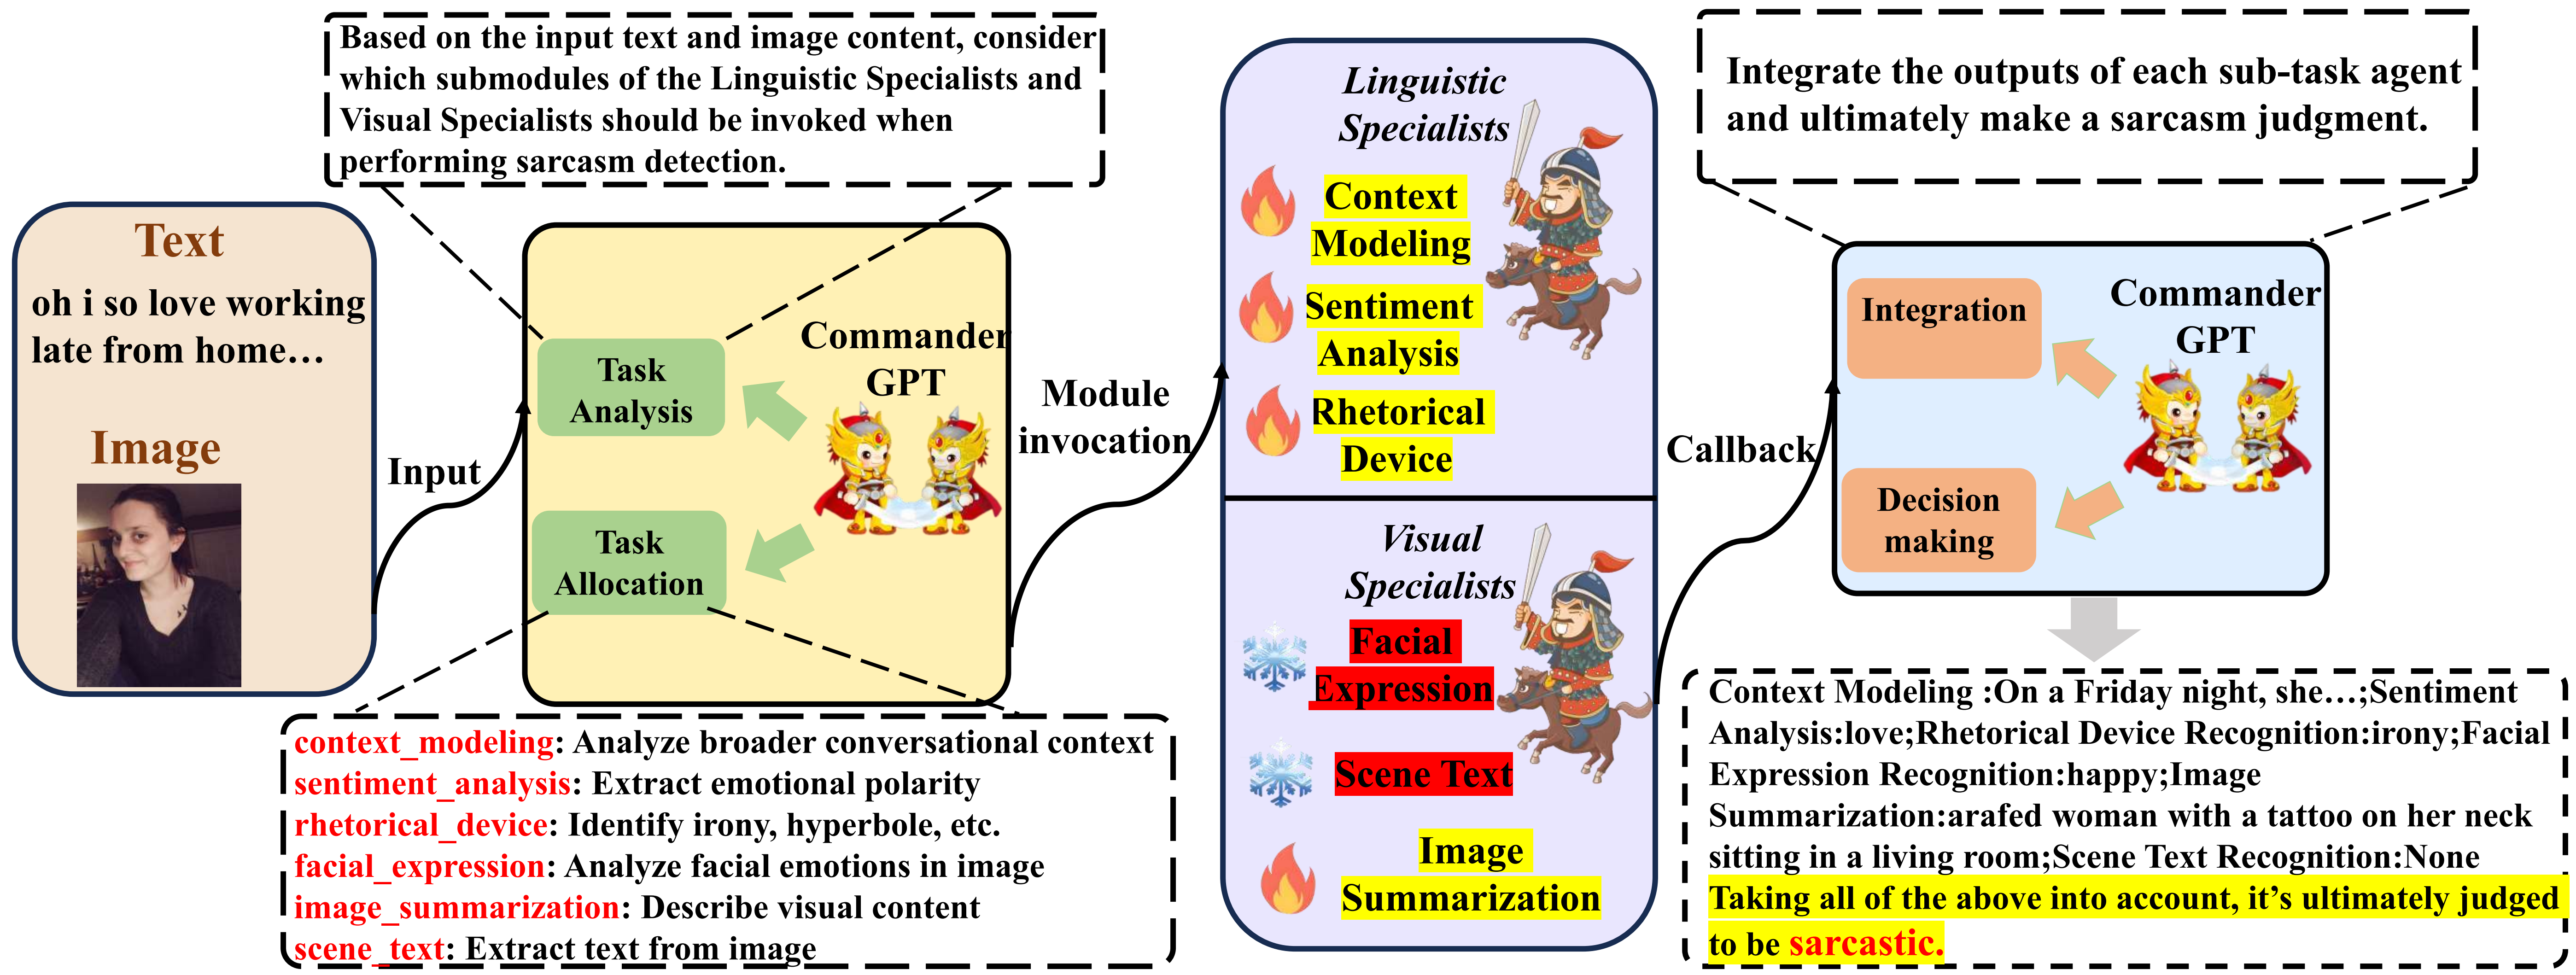

Supplement: supplementary_material [file yuanlitu2.pdf › image/yuanlitu2.pdf]
